# Supplementary material
Source: Springer Nature journal article supplement (https://www.springermedizin.de/resource/supplementary/12877_2013_945_MOESM1_ESM.pdf/9440828)
Supplement: MOESM1 [file 9440828]

## ACT

-Implement improvements to further reduce waiting times  
(further liaison with GPs)

## PLAN

Goals of change: 1) Time from memory service referral to assessment to decrease compared with 2011

2) Time from memory service referral to diagnosis to decrease compared with 2011

Hypothesis: Waiting times will decrease following improvements made in second PDSA cycle in 2011

Test of change: Average waiting times calculated from a sample of patients referred to the service in 2012.

## STUDY

-Data analysed. Patient waiting times in 2012 compared with 2011 data to assess if goals of change met

## DO

-Patient sample identified. A range of information was collected and average waiting times calculated.
